# Supplementary material for: Roles of H2S and NO in regulating the antioxidant system of Vibrio alginolyticus under norfloxacin stress
Source: PeerJ. 2021 Oct 5;9:e12255. doi: 10.7717/peerj.12255 (PMC8500093; doi:10.7717/peerj.12255)
Supplement: Supplemental Information 1 [file peerj-09-12255-s001.xlsx]

## Sheet: Fig. 1
	Data				Statistical results (df=4)
Protein concentration
Treatment	Absorbance	Final result (g/L)
Control-1	0.0986667	0.352321
Control-2	0.119667	0.427309
Control-3	0.122667	0.438021
Norfloxacin-1	0.123667	0.441592
Norfloxacin-2	0.102667	0.366605
Norfloxacin-3	0.113667	0.405884
CBS content					Data analysis
Treatment	Absorbance	U/L	U/L (Multiplied by 5)	Final result (U/gprot)	Compared treatments	Control vs. Norfloxacin
Control-1	0.362667	18.0318	90.1589	255.9	Unpaired t test
Control-2	0.313667	15.5955	77.9775	182.485	P value	0.2482
Control-3	0.388667	19.3245	96.6225	220.589	P value summary	ns
Norfloxacin-1	0.310667	15.4463	77.2317	174.894	Significantly different (P < 0.05)?	No
Norfloxacin-2	0.300667	14.9491	74.7457	203.886	One- or two-tailed P value?	Two-tailed
Norfloxacin-3	0.306667	15.2475	76.2373	187.83	F test to compare variances
					P value	0.2706
					P value summary	ns
					Significantly different (P < 0.05)?	No
NOS content					Data analysis
Treatment	Absorbance	U/L	U/L (Multiplied by 5)	Final result (U/gprot)	Compared treatments	Control vs. Norfloxacin
Control-1	0.295333	7.6196	38.098	108.134	Unpaired t test
Control-2	0.351333	9.0644	45.322	106.064	P value	0.0652
Control-3	0.346333	8.9354	44.677	101.997	P value summary	ns
Norfloxacin-1	0.357333	9.2192	46.096	104.386	Significantly different (P < 0.05)?	No
Norfloxacin-2	0.343333	8.858	44.29	120.811	One- or two-tailed P value?	Two-tailed
Norfloxacin-3	0.346333	8.9354	44.677	110.073	F test to compare variances
					P value	0.196
					P value summary	ns
					Significantly different (P < 0.05)?	No
H2S contnet					Data analysis
Treatment	Absorbance	μmol/L	μmol/L (Multiplied by 5)	Final result (μmol/gprot)	Compared treatments	Control vs. Norfloxacin
Control-1	0.266	10.2701	43.1932	122.596	Unpaired t test
Control-2	0.265	10.2316	51.0964	119.577	P value	0.0062
Control-3	0.22	8.49677	53.0722	121.164	P value summary	**
Norfloxacin-1	0.235	9.07517	45.3758	102.755	Significantly different (P < 0.05)?	Yes
Norfloxacin-2	0.211	8.16832	40.8416	111.405	One- or two-tailed P value?	Two-tailed
Norfloxacin-3	0.218	8.41965	42.0982	103.72	F test to compare variances
					P value	0.1843
					P value summary	ns
					Significantly different (P < 0.05)?	No
					Data analysis
NO contnet	Absorbance	μmol/L	μmol/L (Multiplied by 5)	Final result (μmol/gprot)	Compared treatments	Control vs. Norfloxacin
Control-1	0.323667	47.1259	235.629	668.791	Unpaired t test
Control-2	0.388667	56.5899	282.949	662.166	P value	<0.0001
Control-3	0.406667	59.2107	296.053	675.888	P value summary	****
Norfloxacin-1	0.324667	47.2715	236.357	535.239	Significantly different (P < 0.05)?	Yes
Norfloxacin-2	0.256667	37.3707	186.853	509.686	One- or two-tailed P value?	Two-tailed
Norfloxacin-3	0.292667	42.6123	213.061	524.932	F test to compare variances
					P value	0.4435
					P value summary	ns
					Significantly different (P < 0.05)?	No
H2O2 accumulation				Data analysis
Treatment	Absorbance	μmol/L	Final result (μmol/gprot)	Compared treatments	Control vs. Norfloxacin
Control-1	0.036	10.1347	28.7655	Unpaired t test
Control-2	0.041	11.5423	27.0117	P value	0.0021
Control-3	0.037	10.4162	23.7802	P value summary	**
Norfloxacin-1	0.062	17.4542	39.5257	Significantly different (P < 0.05)?	Yes
Norfloxacin-2	0.038	10.6978	37.2049	One- or two-tailed P value?	Two-tailed
Norfloxacin-3	0.054	15.2021	37.4543	F test to compare variances
				P value	0.4049
				P value summary	ns
				Significantly different (P < 0.05)?	No
SOD expression			Final result	Data analysis
Treatment	Ct value	△△Ct	2-△△Ct	Compared treatments	Control vs. Norfloxacin
Control-1	17.3084	0	1	Unpaired t test
Control-2	16.127	0	1	P value	0.0199
Control-3	18.9973	0	1	P value summary	*
Norfloxacin-1	11.4851	-5.82322	56.6193	Significantly different (P < 0.05)?	Yes
Norfloxacin-2	11.2268	-4.9002	29.8612	One- or two-tailed P value?	Two-tailed
Norfloxacin-3	14.3157	-4.68153	25.6615	F test to compare variances
				P value	<0.0001
				P value summary	****
				Significantly different (P < 0.05)?	Yes
CAT expression			Final result	Data analysis
Treatment	Ct value	△△Ct	2-△△Ct	Compared treatments	Control vs. Norfloxacin
Control-1	13.8342	0	1	Unpaired t test
Control-2	12.2798	0	1	P value	0.0105
Control-3	13.7777	0	1	P value summary	*
Norfloxacin-1	11.7858	-2.04836	4.13635	Significantly different (P < 0.05)?	Yes
Norfloxacin-2	10.7522	-1.52763	2.88312	One- or two-tailed P value?	Two-tailed
Norfloxacin-3	12.4254	-1.3523	2.55319	F test to compare variances
				P value	<0.0001
				P value summary	****
				Significantly different (P < 0.05)?	Yes
GR expression			Final result	Data analysis
Treatment	Ct value	△△Ct	2-△△Ct	Compared treatments	Control vs. Norfloxacin
Control-1	16.4525	0	1	Unpaired t test
Control-2	14.1076	0	1	P value	0.3239
Control-3	16.0735	0	1	P value summary	ns
Norfloxacin-1	9.22754	-7.22496	149.599	Significantly different (P < 0.05)?	No
Norfloxacin-2	10.5901	-3.51748	11.4516	One- or two-tailed P value?	Two-tailed
Norfloxacin-3	14.7547	-1.3188	2.49458	F test to compare variances
				P value	<0.0001
				P value summary	****
				Significantly different (P < 0.05)?	Yes

## Sheet: Fig. 2
	Data				Statistical results (df=4)
Protein concentration
Treatment	Absorbance	Final result (g/L)
Norfloxacin-1（Control）	0.123667	0.441592
Norfloxacin-2	0.102667	0.366605
Norfloxacin-3	0.113667	0.405884
Norfloxacin+SNP-1	0.126667	0.452304
Norfloxacin+SNP-2	0.117667	0.420167
Norfloxacin+SNP-3	0.123667	0.441592
Norfloxacin+PTIO-1	0.184667	0.659412
Norfloxacin+PTIO-2	0.112667	0.402313
Norfloxacin+PTIO-3	0.113667	0.405884
CBS content					Data analysis
Tteatment	Absorbance	U/L	U/L (Multiplied by 5)	Final result (U/gprot)	Compared treatments	Norfloxacin vs. Norfloxacin+SNP	Norfloxacin vs. Norfloxacin+PTIO
Norfloxacin-1	0.310667	15.4463	77.2317	174.894	Unpaired t test
Norfloxacin-2	0.300667	14.9491	74.7457	203.886	P value	0.7335	0.4237
Norfloxacin-3	0.306667	15.2475	76.2373	187.83	P value summary	ns	ns
Norfloxacin+SNP-1	0.302667	15.0486	75.2429	166.355	Significantly different (P < 0.05)?	No	No
Norfloxacin+SNP-2	0.360667	17.9323	89.6617	213.395	One- or two-tailed P value?	Two-tailed	Two-tailed
Norfloxacin+SNP-3	0.297667	14.8	73.9999	167.575	F test to compare variances
Norfloxacin+PTIO-1	0.300667	14.9491	74.7457	113.352	P value	0.4537	0.1922
Norfloxacin+PTIO-2	0.308667	15.3469	76.7345	190.733	P value summary	ns	ns
Norfloxacin+PTIO-3	0.310667	15.4463	77.2317	190.28	Significantly different (P < 0.05)?	No	No
H2S content					Data analysis
Treatment	Absorbance	μmol/L	μmol/L(Multiplied by 5)	μmol/gprot	Compared treatments	Norfloxacin vs. Norfloxacin+SNP	Norfloxacin vs. Norfloxacin+PTIO
Norfloxacin-1	0.235	9.07517	45.3758	102.755	Unpaired t test
Norfloxacin-2	0.211	8.16832	40.8416	111.405	P value	0.0681	0.7075
Norfloxacin-3	0.218	8.41965	42.0982	103.72	P value summary	ns	ns
Norfloxacin+SNP-1	0.302333	9.95584	49.7792	110.057	Significantly different (P < 0.05)?	No	No
Norfloxacin+SNP-2	0.317333	10.4498	52.2489	124.353	One- or two-tailed P value?	Two-tailed	Two-tailed
Norfloxacin+SNP-3	0.331333	10.9108	54.554	123.539	F test to compare variances
Norfloxacin+PTIO-1	0.336333	11.0755	55.3773	90.7609	P value	0.5169	0.3043
Norfloxacin+PTIO-2	0.311333	10.2522	51.261	112.545	P value summary	ns	ns
Norfloxacin+PTIO-3	0.309333	10.1863	50.9317	106.09	Significantly different (P < 0.05)?	No	No

## Sheet: Fig. 3
	Data				Statistical results (df=4)
Protein concentration
Treatment	Absorbance	Final result (g/L)
Norfloxacin-1（Control）	0.123667	0.441592
Norfloxacin-2	0.102667	0.366605
Norfloxacin-3	0.113667	0.405884
Norfloxacin+NaSH-1	0.113667	0.405884
Norfloxacin+NaSH-2	0.104667	0.373746
Norfloxacin+NaSH-3	0.0896667	0.320184
Norfloxacin+HT-1	0.113667	0.405884
Norfloxacin+HT-2	0.112667	0.402313
Norfloxacin+HT-3	0.0976667	0.348751
NOS content					Data analysis
Treatment	Absorbance	U/L	U/L (Multiplied by 5)	Final result (U/gprot)	Compared treatments	Norfloxacin vs. Norfloxacin+NaSH	Norfloxacin vs. Norfloxacin+HT
Norfloxacin-1	0.357333	9.2192	46.096	104.386	Unpaired t test
Norfloxacin-2	0.343333	8.858	44.29	120.811	P value	0.3475	0.6446
Norfloxacin-3	0.346333	8.9354	44.677	110.073	P value summary	ns	ns
Norfloxacin+NaSH-1	0.341333	8.8064	44.032	108.484	Significantly different (P < 0.05)?	No	No
Norfloxacin+NaSH-2	0.345333	8.9096	44.548	119.193	One- or two-tailed P value?	Two-tailed	Two-tailed
Norfloxacin+NaSH-3	0.414333	10.6898	53.449	166.932	F test to compare variances
Norfloxacin+HT-1	0.319333	8.2388	41.194	101.492	P value	0.1341	0.2893
Norfloxacin+HT-2	0.349333	9.0128	45.064	112.012	P value summary	ns	ns
Norfloxacin+HT-3	0.380333	9.8126	49.063	140.682	Significantly different (P < 0.05)?	No	No
NO content					Data analysis
Treatment	Absorbance	μmol/L	μmol/L (Multiplied by 5)	Final result (μmol/gprot)	Compared treatments	Norfloxacin vs. Norfloxacin+NaSH	Norfloxacin vs. Norfloxacin+HT
Norfloxacin-1	0.324667	47.2715	236.357	535.239	Unpaired t test
Norfloxacin-2	0.256667	37.3707	186.853	509.686	P value	0.1891	0.1288
Norfloxacin-3	0.292667	42.6123	213.061	524.932	P value summary	ns	ns
Norfloxacin+NaSH-1	0.309667	45.0875	225.437	555.423	Significantly different (P < 0.05)?	No	No
Norfloxacin+NaSH-2	0.305667	44.5051	222.525	595.391	One- or two-tailed P value?	Two-tailed	Two-tailed
Norfloxacin+NaSH-3	0.367667	53.5323	267.661	835.961	F test to compare variances
Norfloxacin+HT-1	0.324667	47.2715	236.357	582.328	P value	0.0143	0.0429
Norfloxacin+HT-2	0.308667	44.9419	224.709	558.544	P value summary	*	*
Norfloxacin+HT-3	0.344667	50.1835	250.917	719.475	Significantly different (P < 0.05)?	Yes	Yes

## Sheet: Fig. 4
	Data				Statistical results (df=4)
SOD expression			Final result	Data analysis
Treatment	Ct value	△△Ct	2-△△Ct	Compared treatments	Norfloxacin vs. Norfloxacin+SNP	Norfloxacin vs. Norfloxacin+PTIO	Norfloxacin vs. Norfloxacin+NaSH	Norfloxacin vs. Norfloxacin+HT
Norfloxacin-1（Control）	11.4851	0	1	Unpaired t test
Norfloxacin-2	11.2268	0	1	P value	0.0323	0.1914	0.5911	0.1684
Norfloxacin-3	14.3157	0	1	P value summary	*	ns	ns	ns
Norfloxacin+SNP-1	12.2689	0.783785	0.580841	Significantly different (P < 0.05)?	Yes	No	No	No
Norfloxacin+SNP-1	13.8315	2.60469	0.164404	One- or two-tailed P value?	Two-tailed	Two-tailed	Two-tailed	Two-tailed
Norfloxacin+SNP-1	14.8393	0.52357	0.695648	F test to compare variances
Norfloxacin+PTIO-1	11.9214	-0.347515	1.27237	P value	<0.0001	<0.0001	<0.0001	<0.0001																																			12	Na+N	Na+N	55.6791	61.2594	6.12594
Norfloxacin+PTIO-2	10.4102	-3.42134	10.7134	P value summary	****	****	****	****																																			12	N+H	N+H	88.7278	69.6446	6.96446
Norfloxacin+PTIO-3	12.7797	-2.05958	4.16866	Significantly different (P < 0.05)?	Yes	Yes	Yes	Yes																																			13	N+A	N+A	104.126	67.6646	6.76646
Norfloxacin+NaSH-1	13.3955	1.9104	0.266019
Norfloxacin+NaSH-2	13.4779	2.2511	0.210064
Norfloxacin+NaSH-3	13.5659	-0.749862	1.68163
Norfloxacin+HT-1	11.3003	-2.09523	4.27295
Norfloxacin+HT-2	10.2054	-3.27256	9.66357
Norfloxacin+HT-3	13.8921	-0.423573	1.34125
Protein concentration
Treatment	Absorbance	Final result (g/L)
Norfloxacin-1	0.123667	0.441592
Norfloxacin-2	0.102667	0.366605
Norfloxacin-3	0.113667	0.405884
Norfloxacin+SNP-1	0.126667	0.452304
Norfloxacin+SNP-1	0.117667	0.420167
Norfloxacin+SNP-1	0.123667	0.441592
Norfloxacin+PTIO-1	0.184667	0.659412
Norfloxacin+PTIO-2	0.112667	0.402313
Norfloxacin+PTIO-3	0.113667	0.405884
Norfloxacin+NaSH-1	0.113667	0.405884
Norfloxacin+NaSH-2	0.104667	0.373746
Norfloxacin+NaSH-3	0.0896667	0.320184
Norfloxacin+HT-1	0.113667	0.405884
Norfloxacin+HT-2	0.112667	0.402313
Norfloxacin+HT-3	0.0976667	0.348751
H2O2 accumulation				Data analysis
Treatment	Absorbance	μmol/L	Final result (μmol/gprot）	Compared treatments	Norfloxacin vs. Norfloxacin+SNP	Norfloxacin vs. Norfloxacin+PTIO	Norfloxacin vs. Norfloxacin+NaSH	Norfloxacin vs. Norfloxacin+HT
Norfloxacin-1	0.062	17.4542	39.5257	Unpaired t test
Norfloxacin-2	0.038	10.6978	29.1806	P value	0.0031	0.0038	0.7593	0.0008
Norfloxacin-3	0.054	15.2021	37.4543	P value summary	**	**	ns	***
Norfloxacin+SNP-1	0.024	6.75648	14.9379	Significantly different (P < 0.05)?	Yes	Yes	No	Yes
Norfloxacin+SNP-1	0.023	6.47496	15.4104	One- or two-tailed P value?	Two-tailed	Two-tailed	Two-tailed	Two-tailed
Norfloxacin+SNP-1	0.024	6.75648	15.3003	F test to compare variances
Norfloxacin+PTIO-1	0.128	36.0345	54.6465	P value	0.0041	0.0876	0.072	0.8113
Norfloxacin+PTIO-2	0.077	21.677	53.881	P value summary	**	ns	ns	ns
Norfloxacin+PTIO-3	0.081	22.8031	56.1814	Significantly different (P < 0.05)?	Yes	No	No	No
Norfloxacin+NaSH-1	0.05	14.076	34.6799
Norfloxacin+NaSH-2	0.044	12.3869	33.1425
Norfloxacin+NaSH-3	0.04	11.2608	35.1698
Norfloxacin+HT-1	0.099	27.8705	68.6661
Norfloxacin+HT-2	0.102	28.715	71.3749
Norfloxacin+HT-3	0.096	27.0259	77.4935
